# Supplementary material for: Separation of coal combustion residue for critical element extraction and other bulk uses
Source: Royal Society of Chemistry journal article supplement (doi:10.1039/d3va00186e), 2023-11-14
Supplement: d3va00186e1.pdf [file d3va00186e1.pdf]

## Separation of coal combustion residue for critical element extraction and other bulk uses

Kanishk Kumar Karan<sup>1,2</sup>, R. Ebhin Masto<sup>1,2\*</sup>, Hridesh Agarwalla<sup>1,2</sup>, Siddharth Bari<sup>2</sup>,  
Manish Kumar<sup>1,2</sup>, P. Gopinathan<sup>1,2</sup>, Bodhisatwa Hazra<sup>1,2</sup>, Sujan Saha<sup>1,2</sup>, Sudip Maity<sup>1,2</sup>

1. Academy of Scientific and Innovative Research (AcSIR), Ghaziabad-201002, Uttar Pradesh, India.

2. CSIR-Central Institute of Mining and Fuel Research, (Digwadih Campus), Dhanbad-828108, Jharkhand, India.

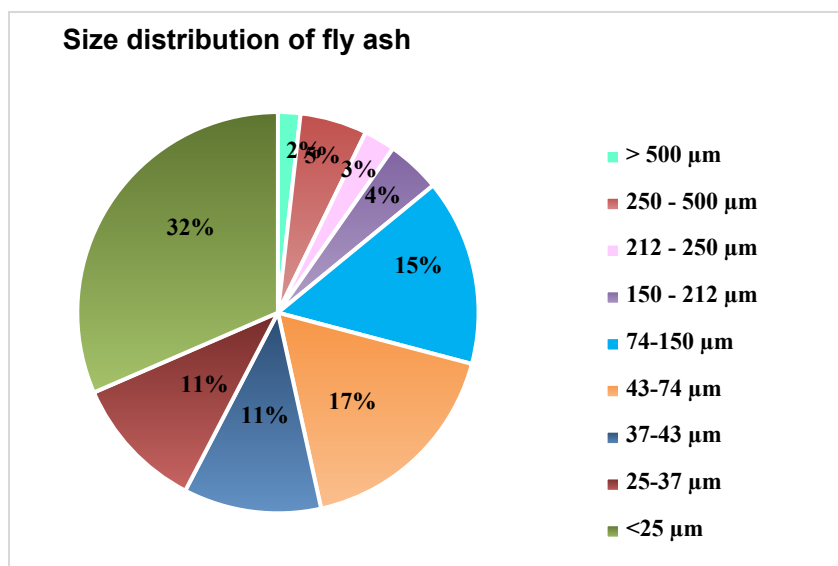

Suppl. Fig 1. Size distribution of fly ash

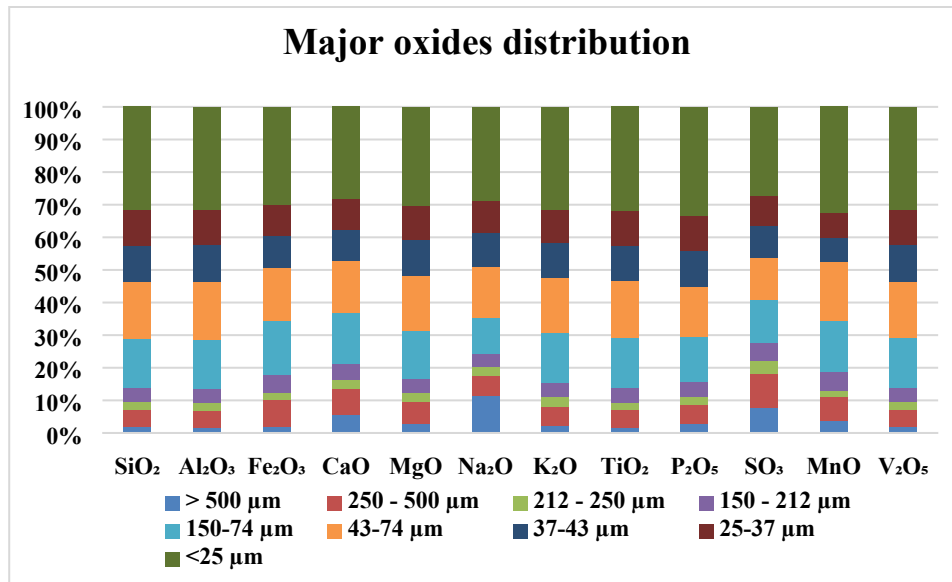

Suppl. Fig. 2, Distribution of major oxides in different size fraction of fly ash

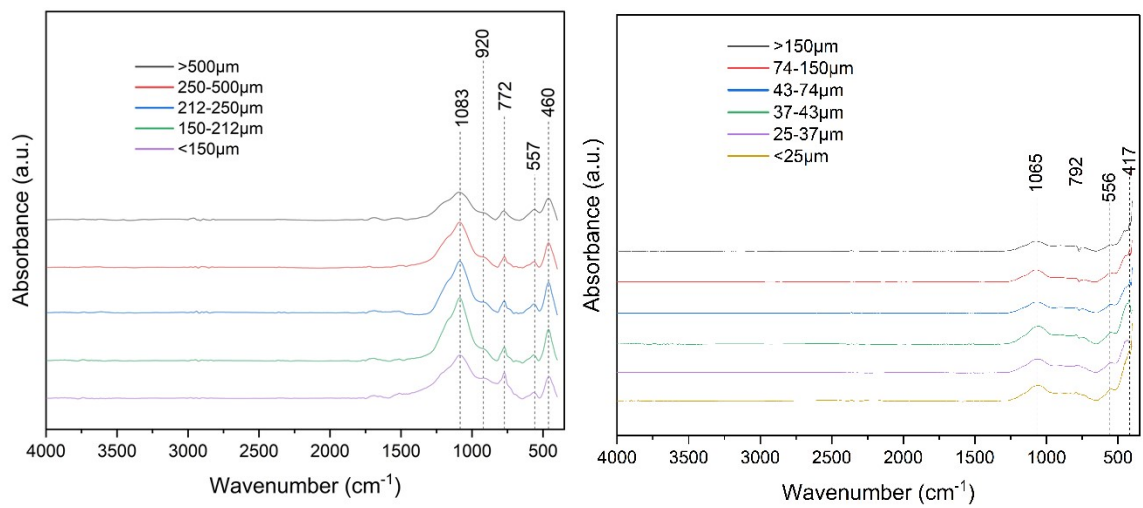

Suppl. Fig. 3 FTIR spectra of different size fractions of fly ash

Suppl. Table 1: Day-wise variation of pH, LOI, electrical conductivity and major oxide composition in Talcher fly ash.

|                                    | Day-1 | Day-2 | Day-3 | Day-4 | Day-5 | Day-6 | Day-7 | Mean | SD   |
|------------------------------------|-------|-------|-------|-------|-------|-------|-------|------|------|
| pH (1:2.5)                         | 6.6   | 6.14  | 5.95  | 6.26  | 6.18  | 5.75  | 6.21  | 6.16 | 0.26 |
| EC ( $\mu\text{S}/\text{cm}$ )     | 446   | 759   | 140.7 | 355   | 201   | 140.4 | 163   | 315  | 228  |
| Major                              | Day-1 | Day-2 | Day-3 | Day-4 | Day-5 | Day-6 | Day-7 | Mean | SD   |
| Al <sub>2</sub> O <sub>3</sub> (%) | 26.1  | 24.6  | 24.9  | 25.4  | 25.1  | 25.5  | 26.1  | 25.4 | 0.57 |
| CaO (%)                            | 1.53  | 0.94  | 1.15  | 1.08  | 1.08  | 0.90  | 0.94  | 1.09 | 0.22 |
| Fe <sub>2</sub> O <sub>3</sub> (%) | 4.53  | 4.02  | 3.83  | 4.02  | 3.87  | 3.91  | 4.14  | 4.05 | 0.24 |
| K <sub>2</sub> O (%)               | 1.71  | 1.41  | 2.08  | 2.38  | 2.19  | 2.26  | 1.65  | 1.95 | 0.36 |
| MgO (%)                            | 0.58  | 0.53  | 0.48  | 0.50  | 0.46  | 0.52  | 0.58  | 0.52 | 0.05 |
| Na <sub>2</sub> O (%)              | 0.17  | 4.05  | 3.88  | 3.71  | 3.69  | 3.55  | 3.94  | 3.28 | 1.38 |
| P <sub>2</sub> O <sub>5</sub> (%)  | 1.08  | 0.63  | 0.74  | 0.72  | 0.68  | 0.59  | 0.63  | 0.72 | 0.17 |
| SO <sub>3</sub> (%)                | 0.31  | 0.20  | 0.13  | 0.26  | 0.14  | 0.17  | 0.11  | 0.19 | 0.07 |
| SiO <sub>2</sub> (%)               | 59.8  | 59.7  | 59.3  | 57.8  | 59.0  | 58.7  | 58.0  | 58.9 | 0.78 |
| TiO <sub>2</sub> (%)               | 1.80  | 1.65  | 1.55  | 1.52  | 1.59  | 1.63  | 1.59  | 1.62 | 0.09 |
| MnO (%)                            | 0.07  | 0.07  | 0.06  | 0.06  | 0.07  | 0.07  | 0.07  | 0.07 | 0.00 |
| V <sub>2</sub> O <sub>5</sub> (%)  | 0.04  | 0.03  | 0.03  | 0.03  | 0.03  | 0.03  | 0.03  | 0.03 | 0.00 |
| LOI (%)                            | 0.65  | 0.39  | 0.31  | 0.57  | 0.35  | 0.48  | 0.42  | 0.45 | 0.12 |
| Total                              | 98.4  | 98.2  | 98.4  | 98.1  | 98.2  | 98.3  | 98.2  | 98.3 | -    |

Suppl. Table 2: - Day-wise variation of trace elements concentration in Talcher fly ash.

| (mg/Kg) | Day-1 | Day-2 | Day-3 | Day-4 | Day-5 | Day-6 | Day-7 | Mean | Stdev | CV (%) | World coal ash |
|---------|-------|-------|-------|-------|-------|-------|-------|------|-------|--------|----------------|
| Ba      | 515   | 465   | 712   | 744   | 756   | 654   | 630   | 639  | 113   | 17.6   | 940            |
| Co      | 24.9  | 32.3  | 35.3  | 36.8  | 35.5  | 35.0  | 36.3  | 33.7 | 4.10  | 12.3   | 32.0           |
| Cr      | 105   | 56.8  | 116   | 135   | 118   | 157   | 93.8  | 112  | 31.8  | 28.5   | 100            |
| Cu      | 70.4  | 62.0  | 71.5  | 77.5  | 67    | 76.8  | 65.8  | 70.1 | 5.7   | 8.1    | 92.0           |
| Ga      | 32.4  | 33.1  | 34.6  | 33.5  | 34.8  | 35.2  | 32.7  | 33.8 | 1.11  | 3.28   | 33.0           |
| Li      | 50.1  | 62.0  | 66.0  | 74.0  | 63.5  | 60.5  | 65.3  | 63.1 | 7.20  | 11.4   | 66.0           |
| Ni      | 33.8  | 57.0  | 75.0  | 73.0  | 74.3  | 81.0  | 60.5  | 64.9 | 16.1  | 24.9   | 76.0           |
| Sr      | 165   | 141   | 167   | 172   | 164   | 153   | 157   | 160  | 10.5  | 6.57   | 740            |

\* World coal ash data from (Ketriss and Yudovich, 2009)

Suppl. Table 3: Day wise variation of REY concentration in Talcher fly ash (BDL, below detection limit, i.e. < 0.25 mg/kg)

|            | Day-1 | Day-2 | Day-3 | Day-4 | Day-5 | Day-6 | Day-7 | mean | SD   |
|------------|-------|-------|-------|-------|-------|-------|-------|------|------|
| Ce         | 88.7  | 58.5  | 63.8  | 58.3  | 70.5  | 61.3  | 71.3  | 67.5 | 10.7 |
| Dy         | 5.50  | BDL   | BDL   | BDL   | BDL   | BDL   | 6.00  | 5.75 | 0.35 |
| Er         | BDL   | BDL  | -    |
| Eu         | 2.1   | 2.25  | 2.75  | 3.25  | 2.5   | 2.25  | 2.00  | 2.4  | 0.44 |
| Gd         | 23.5  | 23.5  | 29.5  | 34.0  | 30.8  | 31.3  | 28.8  | 28.8 | 3.95 |
| Ho         | BDL   | -    | -    |
| La         | 41.6  | 71.0  | 75.3  | 76.5  | 75.0  | 75.0  | 80.3  | 70.7 | 13.1 |
| Lu         | 1.10  | 1.75  | 1.75  | 1.50  | 1.25  | 1.25  | 1.25  | 1.41 | 0.26 |
| Nd         | 101   | 75.0  | 88.3  | 105   | 103   | 97.5  | 103   | 96.1 | 10.8 |
| Pr         | 54.2  | 60.8  | 58.3  | 54.3  | 65.8  | 62.8  | 73.3  | 61.3 | 6.76 |
| Sc         | 24.0  | 17.5  | 18.0  | 18.5  | 18.3  | 17.8  | 18.8  | 19.0 | 2.26 |
| Sm         | 39.0  | 76.0  | 57.5  | 66.3  | 61.8  | 71.8  | 79.3  | 64.5 | 13.6 |
| Tb         | 16.0  | 29.3  | 16.3  | 17.5  | BDL   | 17.5  | 13.0  | 18.3 | 5.63 |
| Tm         | BDL   | -    | -    |
| Y          | 38.4  | 44.5  | 48.3  | 49.3  | 47.8  | 46.5  | 48.0  | 46.1 | 3.72 |
| Yb         | 4.80  | 2.25  | 3.50  | 3.25  | 2.75  | 2.75  | 3.50  | 3.26 | 0.82 |
| REY        | 440   | 462   | 463   | 487   | 479   | 488   | 529   | 478  | 27.8 |
| LREY       | 325   | 341   | 343   | 360   | 376   | 368   | 407   | 360  | 27.2 |
| MREY       | 86    | 100   | 97    | 104   | 81    | 98    | 98    | 94.6 | 8.20 |
| HREY       | 5.90  | 4.00  | 5.25  | 4.75  | 4.00  | 4.00  | 4.75  | 4.66 | 0.73 |
| Critical   | 163   | 151   | 156   | 175   | 153   | 164   | 172   | 162  | 9.30 |
| Uncritical | 158   | 231   | 221   | 231   | 233   | 241   | 262   | 225  | 32.1 |
| Excessive  | 94.6  | 62.5  | 69.0  | 63.0  | 74.5  | 65.3  | 76.0  | 72.1 | 11.2 |
| Coutl      | 1.03  | 0.65  | 0.71  | 0.76  | 0.66  | 0.68  | 0.66  | 0.72 | 0.14 |

#### Reference

Ketris, M.á., Yudovich, Y.E., 2009. Estimations of Clarkes for Carbonaceous biolithes: World averages for trace element contents in black shales and coals. *International journal of coal geology* 78, 135-148.
